# Supplementary material for: “Can you hear me? Can anybody pretty please validate [me]?”: The Long Shadow of Separation and Liminality in Remediation
Source: Research Square preprint supplement (doi:10.21203/rs.3.rs-6666564/v1), 2025-06-26
Supplement: Supplementary file 1 [file 98c8a5c92dc0efcb6824d610.docx]

**Interview Questions:**

Goals/Aims

1. Better understand the needs and challenges of all students who are remediated or disenrolled from USU
2. Identify any specific patterns in UiM students challenges or needs that lead to/contributed to remediation and/or disenrollment
3. Identify target areas to improve student retention and progression

What happened?

- Beginning/pre process:
  - Were they performing well or struggling?
  - Were there external events going on in their lives that potentially catalyzed this process)?
- Middle (during remediation and disenrollment):
  - What was the cause?
  - How did the process unfold (was it clearly laid out, is it consistent with others across participants)?
  - How did it affect their lives/studies/relationships?
- End (post process):
  - How did it feel then vs. now?
  - What would have been helpful to them during the process/what could USU have done differently?
  - Where are they now (physically and emotionally)?
  - What role, if any, did this process play in their trajectory/professional choices?

**Interview questions:**

1. Put yourself back into the timeframe of when you experienced remediation or disenrollment. Describe each of the steps that you went through in that process. For example, can you describe:
   1. When in your training did you experience remediation or disenrollment?
   2. What precipitated it?
   3. Who was involved?
   4. What were the steps you went through?
2. At the time, how did it affect you in terms of your life, studies, and relationships?
3. What do you wish USU would have known at that time?
4. What do you wish USU would have done differently at that time?
5. Now that some time has passed since you experienced disenrollment or remediation, how do you feel about the experience?
6. In what ways, if any, did this process play a role in your trajectory/professional choices?
7. Why did you want to do this interview?

Age

Gender

Year of Remediation

Race

Ethnicity

Additional questions to add after pilot:

1. Did anyone push you to really reflect on the experience you were going through and/or have a challenging conversation about the experience of remediation/disenrollment?

2. What was going on in your personal life that might have affected you and/or led to remediation/disenrollment?

3. What did it feel like to go through remediation/disenrollment?
