# Supplementary material for: “Can you hear me? Can anybody pretty please validate [me]?”: The Long Shadow of Separation and Liminality in Remediation
Source: Research Square preprint supplement (doi:10.21203/rs.3.rs-6666564/v1), 2025-06-26
Supplement: Supplementary file 2 [file a81cdd045cff4105eaf8c6e7.docx]

Table 1: Reasons and Triggers for Deceleration

| **Reason for deceleration** | **Amount (%)** |
| --- | --- |
| Low grades | 3 (20) |
| Poor adjustment to coursework | 5 (33) |
| Step 1 issues | 3 (20) |
| Failed exam or module | 3 (20) |
| Professionalism | 1 (7) |
| **Issues participants felt contributed to deceleration** | **Amount (%)** |
| Personal stressors | 9 (60) |
| Mental health issues and personal stressors | 1 (7) |
| Undiagnosed sleep disorder | 1 (7) |
| Cultural struggles | 1 (7) |
| None identified | 3 (20) |
