# Supplementary material for: “Can you hear me? Can anybody pretty please validate [me]?”: The Long Shadow of Separation and Liminality in Remediation
Source: Research Square preprint supplement (doi:10.21203/rs.3.rs-6666564/v1), 2025-06-26
Supplement: Supplementary file 3 [file e5e7e88df645612f64f81a0b.docx]

Table 2: Participant Characteristics

| **Gender** | **amount (%)** |
| --- | --- |
| Male | 8 (53) |
| Female | 7 (47) |
| **Race/ethnicity** | **amount (%)** |
| White | 4 (27) |
| unstated | 8 (53) |
| other/multiracial | 3 (20) |
| **Deceleration year** | **amount (%)** |
| 2007 | 1 (7) |
| 2008 | 3 (20) |
| 2009 | 3 (20) |
| 2010 | 1 (7) |
| 2011 | 1 (7) |
| 2012 | 2 (13) |
| 2013 | 1 (7) |
| 2014 | 2 (13) |
| 2017 | 1 (7) |
